# Supplementary material for: Identification of Effective Anticancer G-Quadruplex-Targeting Chemotypes through the Exploration of a High Diversity Library of Natural Compounds
Source: MDPI journal article supplement (doi:10.3390/pharmaceutics13101611), 2021-10-03
Supplement: s1 [file s1]

## Supplementary Material

# Identification of Effective Anticancer G-Quadruplex-Targeting Chemotypes through the Exploration of a High Diversity Library of Natural Compounds

Chiara Platella <sup>1,†</sup>, Francesca Ghirga <sup>2,†</sup>, Pasquale Zizza <sup>3</sup>, Luca Pompili <sup>3</sup>, Simona Marzano <sup>4</sup>, Bruno Pagano <sup>4</sup>, Deborah Quaglio <sup>2</sup>, Valeria Vergine <sup>2</sup>, Silvia Cammarone <sup>2</sup>, Bruno Botta <sup>2</sup>, Annamaria Biroccio <sup>3</sup>, Mattia Mori <sup>5,\*</sup> and Daniela Montesarchio <sup>1,\*</sup>

**Citation:** Platella, C.; Ghirga, F.; Zizza, P.; Pompili, L.; Marzano, S.; Pagano, B.; Vergine, V.; Cammarone, S.; Botta, B.; Biroccio, A.; et al. Identification of Effective Anticancer G-Quadruplex-Targeting Chemotypes through the Exploration of a High Diversity Library of Natural Compounds. *Pharmaceutics* **2021**, *13*, 1611. <https://doi.org/10.3390/pharmaceutics13101611>

Academic Editors: Jung Min Shin, Eun Sook Lee

Received: 13 August 2021

Accepted: 26 September 2021

Published: 3 October 2021

**Publisher's Note:** MDPI stays neutral with regard to jurisdictional claims in published maps and institutional affiliations.

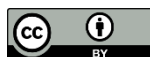

**Copyright:** © 2021 by the authors. Licensee MDPI, Basel, Switzerland. This article is an open access article distributed under the terms and conditions of the Creative Commons Attribution (CC BY) license (<http://creativecommons.org/licenses/by/4.0/>).

<sup>1</sup> Department of Chemical Sciences, University of Naples Federico II (Complesso Universitario di Monte S. Angelo), Via Cintia, 21, 80126 Napoli, Italy; chiara.platella@unina.it

<sup>2</sup> Department of Chemistry and Technology of Drugs, “Department of Excellence 2018–2022”, Sapienza University of Rome, P.le Aldo Moro 5, 00185 Rome, Italy; francesca.ghirga@uniroma1.it (F.G.); deborah.quaglio@uniroma1.it (D.Q.); valeria.vergine@uniroma1.it (V.V.); silvia.cammarone@uniroma1.it (S.C.); bruno.botta@uniroma1.it (B.B.)

<sup>3</sup> Oncogenomic and Epigenetic Unit, IRCCS—Regina Elena National Cancer Institute, Via Elio Chianesi 53, 00144, Rome, Italy; pasquale.zizza@ifo.gov.it (P.Z.); luca.pompili@ifo.gov.it (L.P.); annamaria.biroccio@ifo.gov.it (A.B.)

<sup>4</sup> Department of Pharmacy, “Department of Excellence 2018–2022”, University of Naples Federico II, via D.Montesano, 49, 80131 Napoli, Italy; simona.marzano@unina.it (S.M.); bruno.pagano@unina.it (B.P.)

<sup>5</sup> Department of Biotechnology, Chemistry and Pharmacy, “Department of Excellence 2018–2022”, University of Siena, Via Aldo Moro 2, 53100 Siena, Italy

\* Correspondence: mattia.mori@unisi.it (M.M.); daniela.montesarchio@unina.it (D.M.)

† These authors equally contributed to this work.

Table S1. Chemical structures, features and natural sources of the 28 natural compounds here investigated.

| Cpd       | Common Name<br>(Library Code)       | Chemical Structure                                                                  | M. W.                      | Molecular<br>Formula                                               | Source                                                                                                                                                                                       | Reference |
|-----------|-------------------------------------|-------------------------------------------------------------------------------------|----------------------------|--------------------------------------------------------------------|----------------------------------------------------------------------------------------------------------------------------------------------------------------------------------------------|-----------|
| Alkaloids |                                     |                                                                                     |                            |                                                                    |                                                                                                                                                                                              |           |
| 1         | <b>Bulbocapnine·HCl</b><br>(BBN196) | 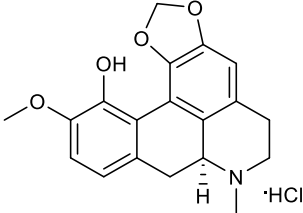   | 325.36<br>361.82<br>(+HCl) | C <sub>19</sub> H <sub>19</sub> NO <sub>4</sub> ·HCl               | Species:<br><i>Corydalis cava</i> (Papaveraceae family)                                                                                                                                      | [1]       |
| 2         | <b>Chelidonine</b><br>(BBN192)      |    | 353.37                     | C <sub>20</sub> H <sub>19</sub> NO <sub>5</sub>                    | Species: <i>Chelidonium majus</i> L.<br>(Papaveraceae family)                                                                                                                                | [2]       |
| 3         | <b>Emetine·HCl</b><br>(BBN39)       |   | 480.65<br>517.11<br>(+HCl) | C <sub>29</sub> H <sub>40</sub> N <sub>2</sub> O <sub>4</sub> ·HCl | Species: <i>Psychotria ipecacuanha</i> Stokes<br>(Rubiaceae family)                                                                                                                          | [3]       |
| 4         | <b>Hydrastine</b><br>(BBN40)        |  | 383.40                     | C <sub>21</sub> H <sub>21</sub> NO <sub>6</sub>                    | Species:<br><i>Hydrastis canadensis</i> L. (Ranunculaceae family)                                                                                                                            | [4]       |
| 5         | <b>Narceine</b><br>(BBN254)         |  | 445.46                     | C <sub>23</sub> H <sub>27</sub> NO <sub>8</sub>                    | Species:<br><i>P. somniferum</i> L. (Papaveraceae family).                                                                                                                                   | [5]       |
| 6         | <b>Aspidospermine</b><br>(BBN44)    |  | 354.49                     | C <sub>22</sub> H <sub>30</sub> N <sub>2</sub> O <sub>2</sub>      | Aspidosperma species:<br><i>Aspidosperma album</i> ,<br><i>Aspidosperma australe</i> ,<br><i>Aspidosperma exaltatum</i> ,<br><i>Aspidosperma peroba</i> ,<br><i>Aspidosperma polynuron</i> , | [6]       |

|    |                        |                                                                                     |                         |                                                                    |                                                                                                                                                                                                                                               |                                                                                                                                                                                                                                                      |
|----|------------------------|-------------------------------------------------------------------------------------|-------------------------|--------------------------------------------------------------------|-----------------------------------------------------------------------------------------------------------------------------------------------------------------------------------------------------------------------------------------------|------------------------------------------------------------------------------------------------------------------------------------------------------------------------------------------------------------------------------------------------------|
|    |                        |                                                                                     |                         |                                                                    |                                                                                                                                                                                                                                               | <i>Aspidosperma pyricollum</i> ,<br><i>Aspidosperma pyrifolium</i> ,<br><i>Aspidosperma quebracho-blanco</i> ,<br><i>Aspidosperma quirandy</i> ,<br><i>Aspidosperma sessiflorum</i> ,<br><i>Aspidosperma rhombeosignatum</i><br>(Apocynaceae family) |
| 7  | Vomicine (BBN186)      | 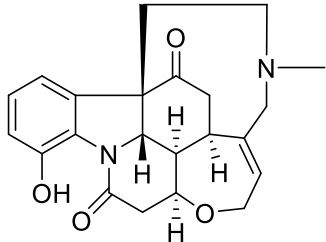   | 380.44                  | C <sub>22</sub> H <sub>24</sub> N <sub>2</sub> O <sub>4</sub>      | Species:<br><i>Strychnos icaja</i><br>(Loganiaceae family)                                                                                                                                                                                    | [7, 8]                                                                                                                                                                                                                                               |
| 8  | Ibogaine (BBN236)      |   | 310.43                  | C <sub>20</sub> H <sub>26</sub> N <sub>2</sub> O                   | Species: <i>Tabernanthe iboga</i> (Apocynaceae family)                                                                                                                                                                                        | [9]                                                                                                                                                                                                                                                  |
| 9  | Yohimbine·HCl (BBN174) |  | 354.44<br>390.90 (+HCl) | C <sub>21</sub> H <sub>26</sub> N <sub>2</sub> O <sub>3</sub> ·HCl | Species:<br><i>Aspidosperma discolor</i> A. DC.,<br><i>Aspidosperma excelsum</i> Benth,<br><i>Aspidosperma eburneum</i> F. Allem,<br><i>Aspidosperma marcgravianum</i> Woodson,<br><i>Aspidosperma oblongum</i> A. DC<br>(Apocynaceae family) | [10]                                                                                                                                                                                                                                                 |
| 10 | Jervine (BBN47)        |  | 425.60                  | C <sub>27</sub> H <sub>39</sub> NO <sub>3</sub>                    | Veratrum species: <i>V. album</i> ; <i>V. dahuricum</i> ; <i>V. lobelianum</i> ; <i>V. nigrum</i> ; <i>V. nigrum</i> var. <i>ussuriense</i> ; <i>V. patulum</i> ; <i>V. stenophyllum</i> ; <i>V. taliense</i><br>(Buxaceae family)            | [11]                                                                                                                                                                                                                                                 |
| 11 | Solanidine (BBN209)    |  | 397.65                  | C <sub>27</sub> H <sub>43</sub> NO                                 | Veratrum species: <i>V. mentzeanum</i> ; <i>V. taliense</i><br>(Buxaceae family)<br>Fritillaria species: <i>F.</i>                                                                                                                            | [11]                                                                                                                                                                                                                                                 |

|                           |                                                             |                                                                                     |                            |                              |                                                                                                                       |                                                                                             |
|---------------------------|-------------------------------------------------------------|-------------------------------------------------------------------------------------|----------------------------|------------------------------|-----------------------------------------------------------------------------------------------------------------------|---------------------------------------------------------------------------------------------|
|                           |                                                             |                                                                                     |                            |                              |                                                                                                                       | <i>camtschatcensis</i> ; <i>F. tortifolia</i> ; <i>F. ussuriensis</i><br>(Liliaceae family) |
| 12                        | <b>Vindoline (BBN218)</b>                                   | 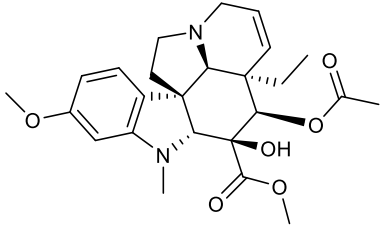   | 456.53                     | $C_{25}H_{32}N_2O_6$         | Species:<br><i>Catharanthus roseus</i><br>(Apocynaceae family)                                                        | [12]                                                                                        |
| 13                        | <b>Veratrine.HCl (BBN173)</b>                               |    | 591.73<br>628.19<br>(+HCl) | $C_{32}H_{49}NO_9 \cdot HCl$ | Species:<br><i>Veratrum lobelianum</i><br>( <u>Melanthiaceae</u> family)                                              | [11]                                                                                        |
| <b>Phenolic Compounds</b> |                                                             |                                                                                     |                            |                              |                                                                                                                       |                                                                                             |
| <b>Anthranoids</b>        |                                                             |                                                                                     |                            |                              |                                                                                                                       |                                                                                             |
| 14                        | <b>Ferruginin A (BBN240)</b>                                |  | 460.60                     | $C_{30}H_{36}O_4$            | Species:<br><i>Vismia baccifera</i><br>var. <i>ferruginea</i> and<br><i>Vismia decipiens</i><br>(Hypericaceae family) | [13, 14]                                                                                    |
| 15                        | <b><math>\gamma, \gamma'</math>-OH-Ferruginin A (BBN35)</b> |  | 492.61                     | $C_{30}H_{36}O_6$            | Species:<br><i>Vismia guaranirangae</i> (Hypericaceae family)                                                         | [13, 15]                                                                                    |
| 16                        | <b>Ferruginin B (BBN161)</b>                                |  | 460.61                     | $C_{30}H_{36}O_4$            | Species:<br><i>Vismia baccifera</i><br>var. <i>ferruginea</i> and<br><i>Vismia decipiens</i><br>(Hypericaceae family) | [13, 14]                                                                                    |
| 17                        | <b>Ferruanthrone (BBN257)</b>                               |  | 460.61                     | $C_{30}H_{36}O_4$            | Species:<br><i>Vismia baccifera</i><br>var. <i>ferruginea</i> and<br><i>Vismia decipiens</i><br>(Hypericaceae family) | [13, 14]                                                                                    |

## Steroids

|                         |                            |                                                                                     |         |                                                 |                                                                                                                                                                         |      |
|-------------------------|----------------------------|-------------------------------------------------------------------------------------|---------|-------------------------------------------------|-------------------------------------------------------------------------------------------------------------------------------------------------------------------------|------|
| 23                      | Diosgenin<br>(BBN256)      | 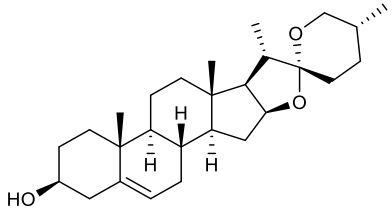   | 414.63  | C <sub>27</sub> H <sub>42</sub> O <sub>3</sub>  | Species: <i>Dracaena cambodiana</i> and <i>Chlorophytum laxum</i> (Asparagaceae family)<br>Species: <i>Balanites aegyptiaca</i> (Zygophyllaceae or Balanitaceae family) | [21] |
| 24                      | Digitonin<br>(BBN253)      |    | 1229.32 | C <sub>56</sub> H <sub>92</sub> O <sub>29</sub> | Species: <i>Digitalis lanata</i> and <i>Digitalis purpurea</i> (Scrophulariaceae family)                                                                                | [22] |
| 25                      | 20-OH-Ecdysone<br>(BBN258) |   | 480.64  | C <sub>27</sub> H <sub>44</sub> O <sub>7</sub>  | Species: <i>Chenopodium quinoides</i> Willd. (Chenopodiaceae family)                                                                                                    | [23] |
| Diels Alder type adduct |                            |                                                                                     |         |                                                 |                                                                                                                                                                         |      |
| 26                      | Kuwanon G<br>(BBN99)       |  | 692.72  | C <sub>40</sub> H <sub>36</sub> O <sub>11</sub> | Species: <i>Morus nigra</i> (Moraceae family)                                                                                                                           | [24] |
| Dibenzofuran            |                            |                                                                                     |         |                                                 |                                                                                                                                                                         |      |
| 27                      | Usnic acid<br>(BBN66)      |  | 344.32  | C <sub>18</sub> H <sub>16</sub> O <sub>7</sub>  | Species: <i>Ramalina hierensis</i> (Ramalinaceae family)                                                                                                                | [25] |
| Cyanogenic glycoside    |                            |                                                                                     |         |                                                 |                                                                                                                                                                         |      |

|    |                       |                                                                                   |        |                       |                                                    |      |
|----|-----------------------|-----------------------------------------------------------------------------------|--------|-----------------------|----------------------------------------------------|------|
| 28 | Amygdaline<br>(BBN96) | 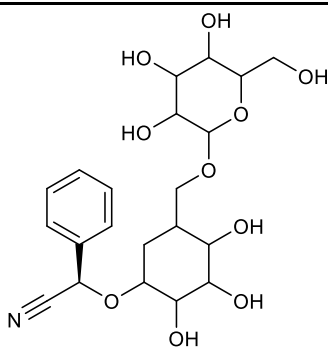 | 455.46 | $C_{21}H_{29}NO_{10}$ | Seeds of numerous<br>members of<br>Rosaceae family | [26] |
|----|-----------------------|-----------------------------------------------------------------------------------|--------|-----------------------|----------------------------------------------------|------|

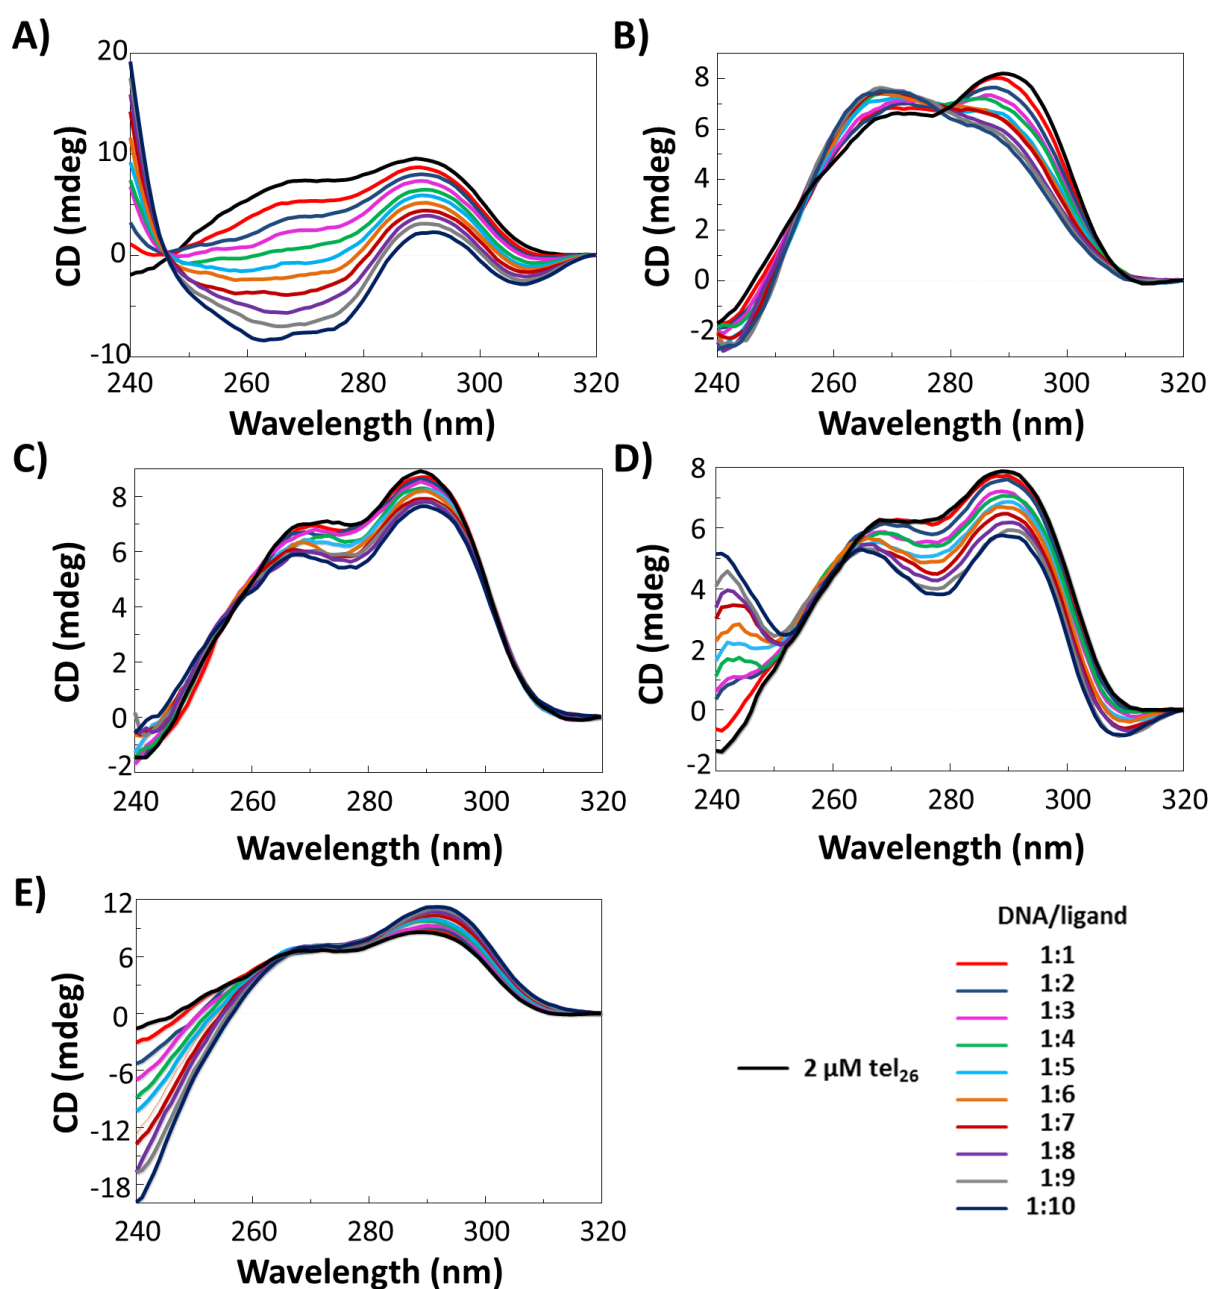

**Figure S1.** CD spectra of 2  $\mu$ M solutions of tel<sub>26</sub> G4 in 5 mM KCl, 5 mM phosphate buffer, 5% DMSO (pH 7) in the presence of increasing amounts (up to 10 equivalents) of (A) Bulbocapnine, (B) Chelidonine, (C) Ibogaine, (D) Rotenone and (E) Vomicine.

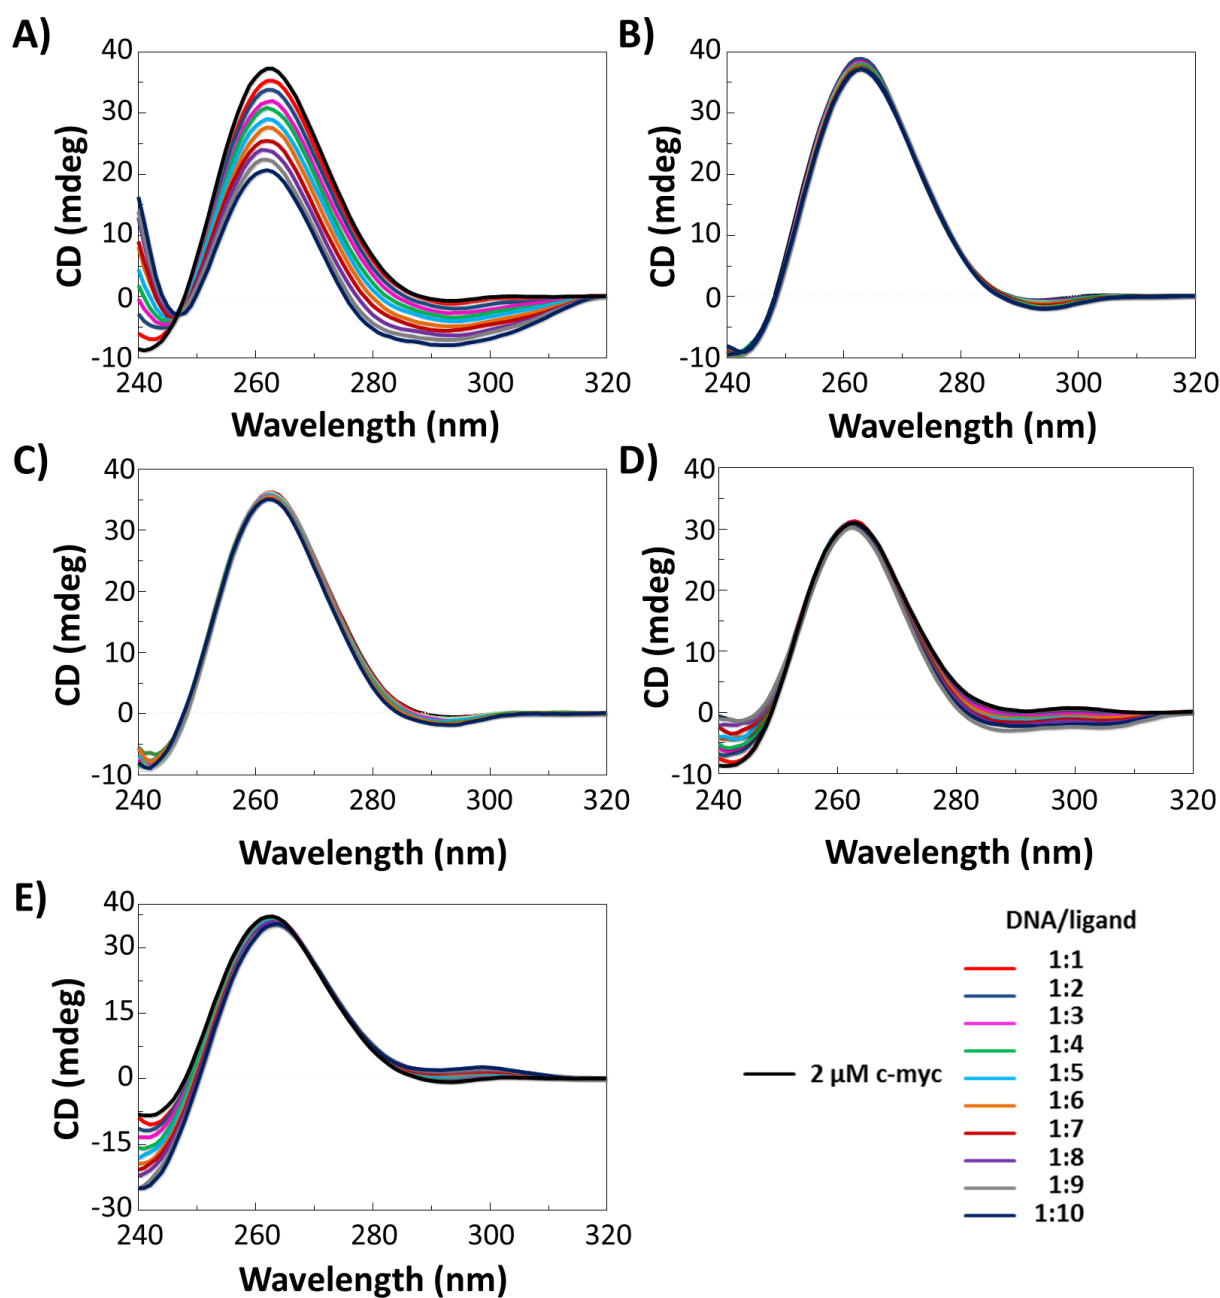

**Figure S2.** CD spectra of 2  $\mu$ M solutions of c-myc G4 in 5 mM KCl, 5 mM phosphate buffer, 5% DMSO (pH 7) in the presence of increasing amounts (up to 10 equivalents) of (A) Bulbocapnine, (B) Chelidonium, (C) Ibogaine, (D) Rotenone and (E) Vomicine.



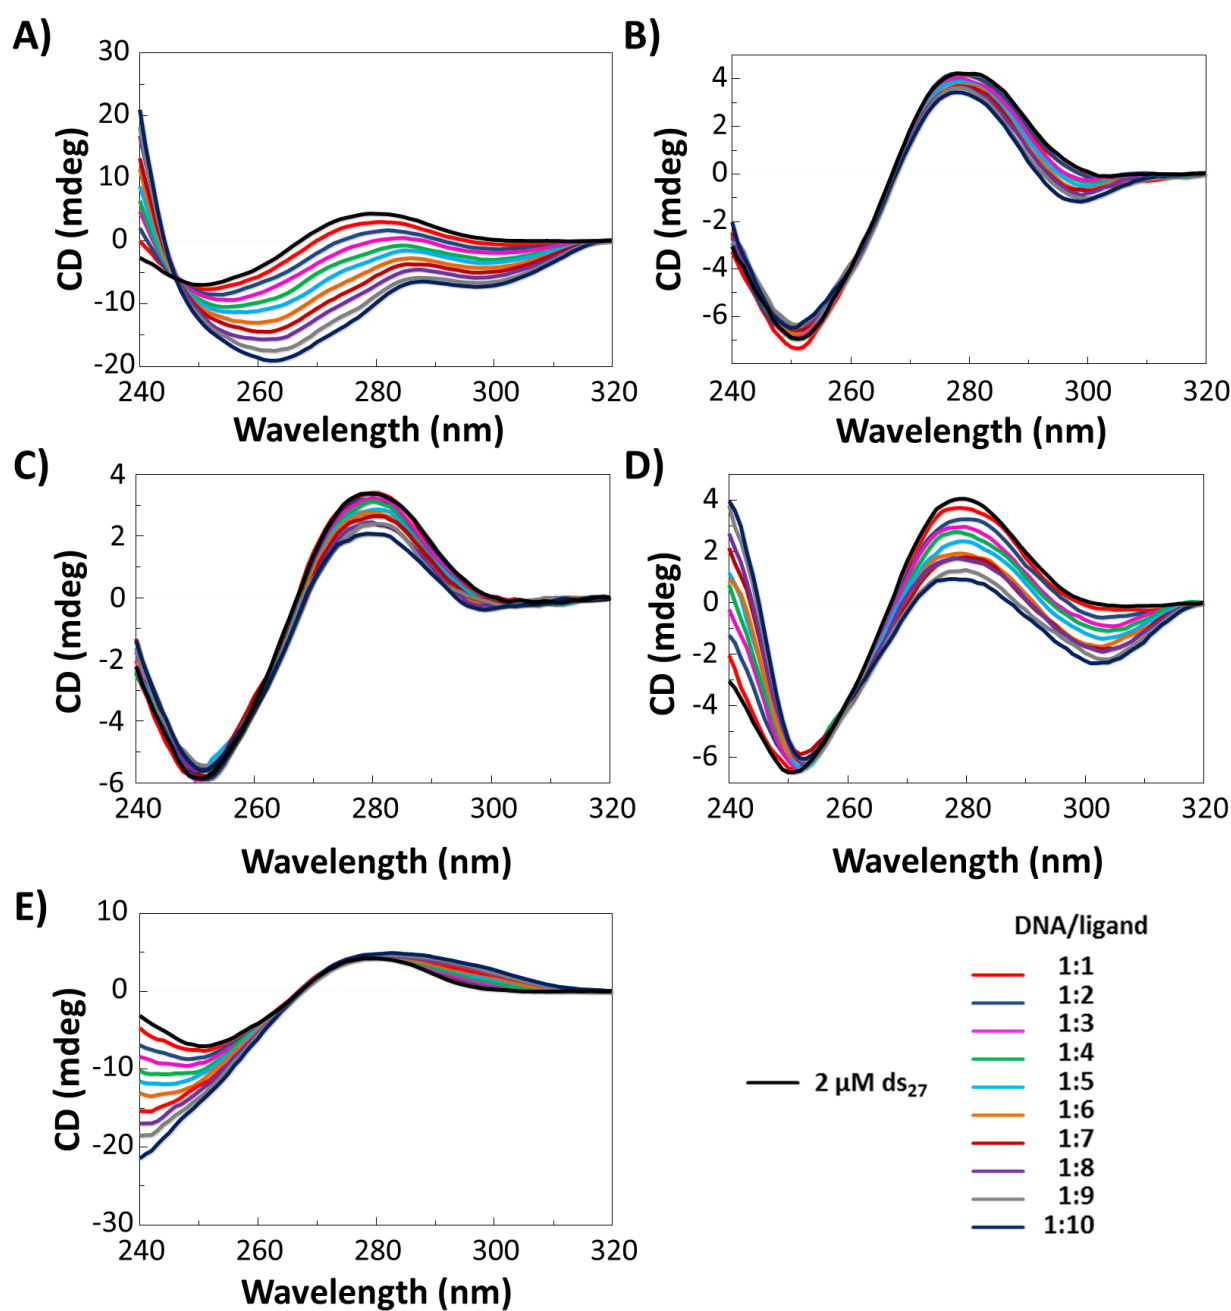

**Figure S3.** CD spectra of 2  $\mu$ M solutions of  $ds_{27}$  duplex in 5 mM KCl, 5 mM phosphate buffer, 5% DMSO (pH 7) in the presence of increasing amounts (up to 10 equivalents) of (A) Bulbocapnine, (B) Chelidonine, (C) Ibogaine, (D) Rotenone and (E) Vomicine.

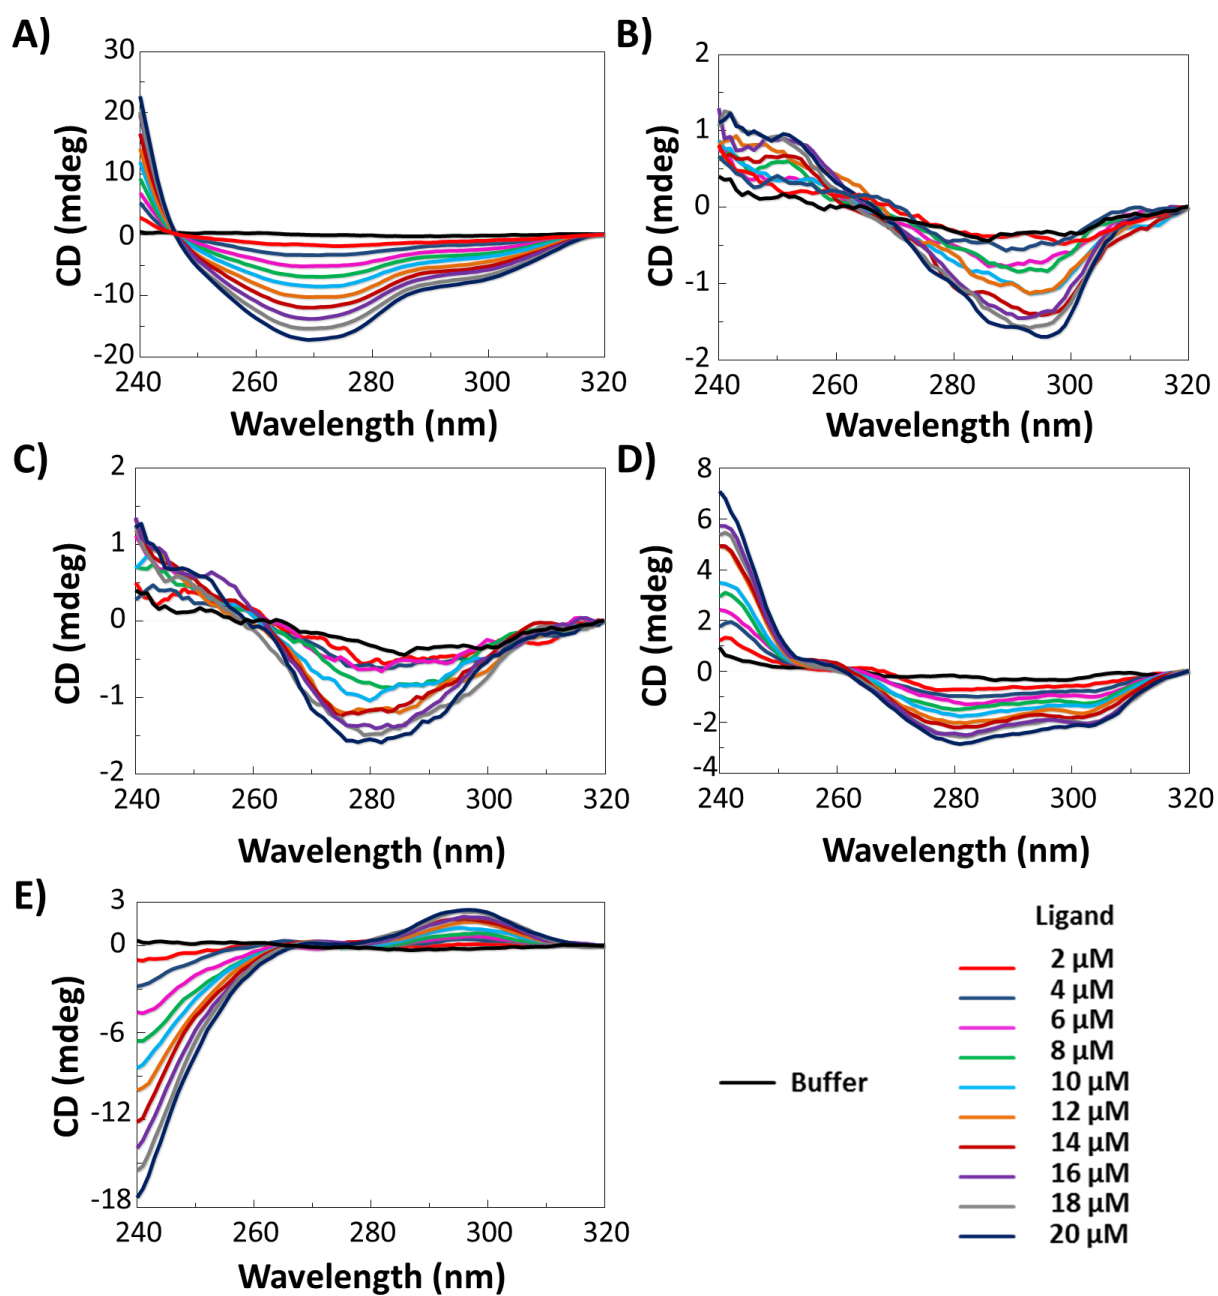

**Figure S4.** CD spectra of solutions (from 2 to 20  $\mu\text{M}$ ) of (A) Bulbocapnine, (B) Chelidonine, (C) Ibogaine, (D) Rotenone and (E) Vomicine in 5 mM KCl, 5 mM phosphate buffer, 5% DMSO (pH 7).

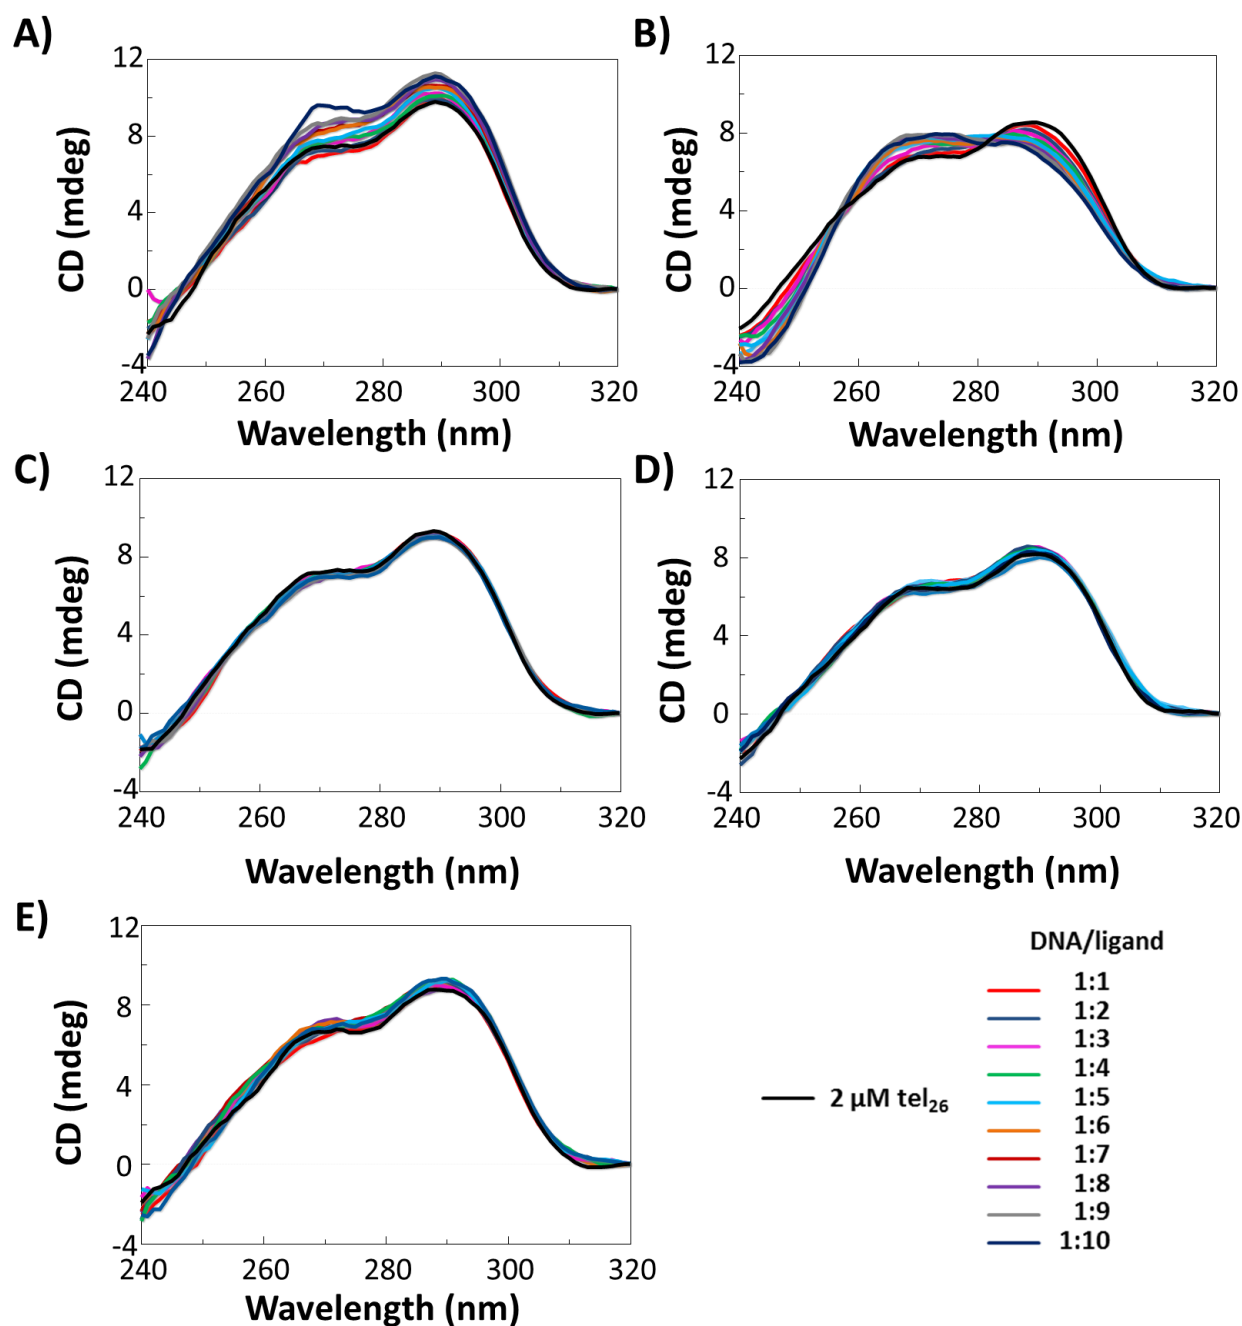

**Figure S5.** CD spectra (after ligand contribution subtraction) of 2  $\mu\text{M}$  solutions of tel<sub>26</sub> G4 in 5 mM KCl, 5 mM phosphate buffer, 5% DMSO (pH 7) with increasing amounts (up to 10 molar equivalents) of (A) Bulbocapnine, (B) Chelidونية, (C) Ibogaine, (D) Rotenone and (E) Vomoxetine.

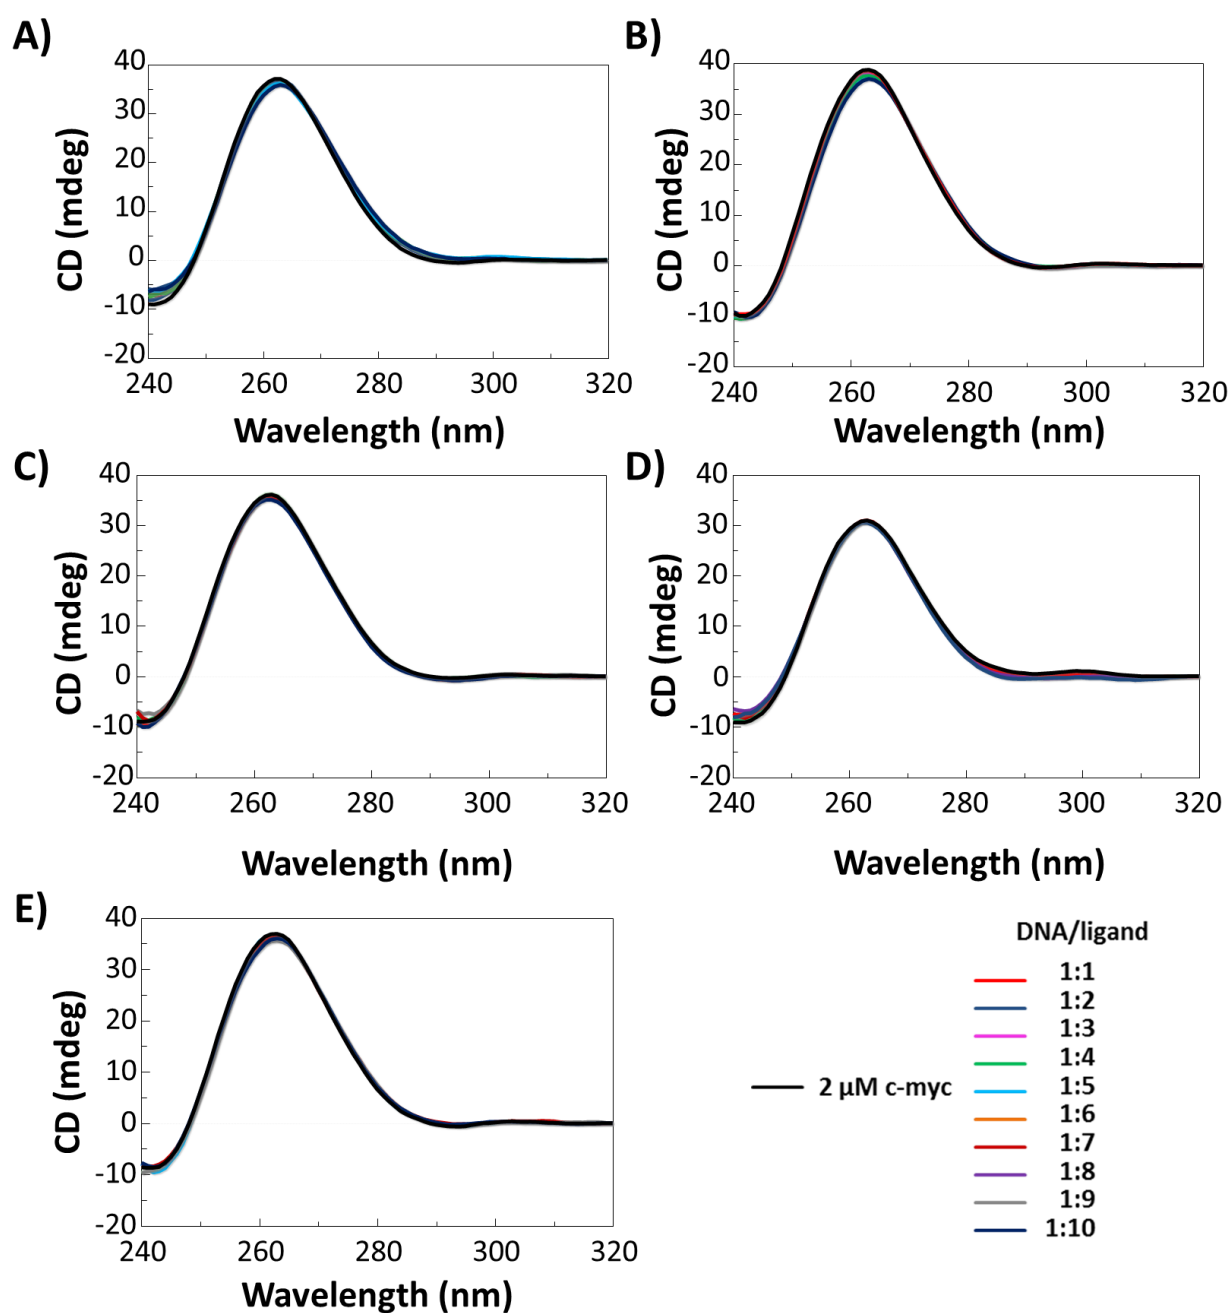

**Figure S6.** CD spectra (after ligand contribution subtraction) of 2  $\mu$ M solutions of c-myc G4 in 5 mM KCl, 5 mM phosphate buffer, 5% DMSO (pH 7) with increasing amounts (up to 10 molar equivalents) of (A) Bulbocapnine, (B) Chelidonine, (C) Ibogaine, (D) Rotenone and (E) Vomicine.

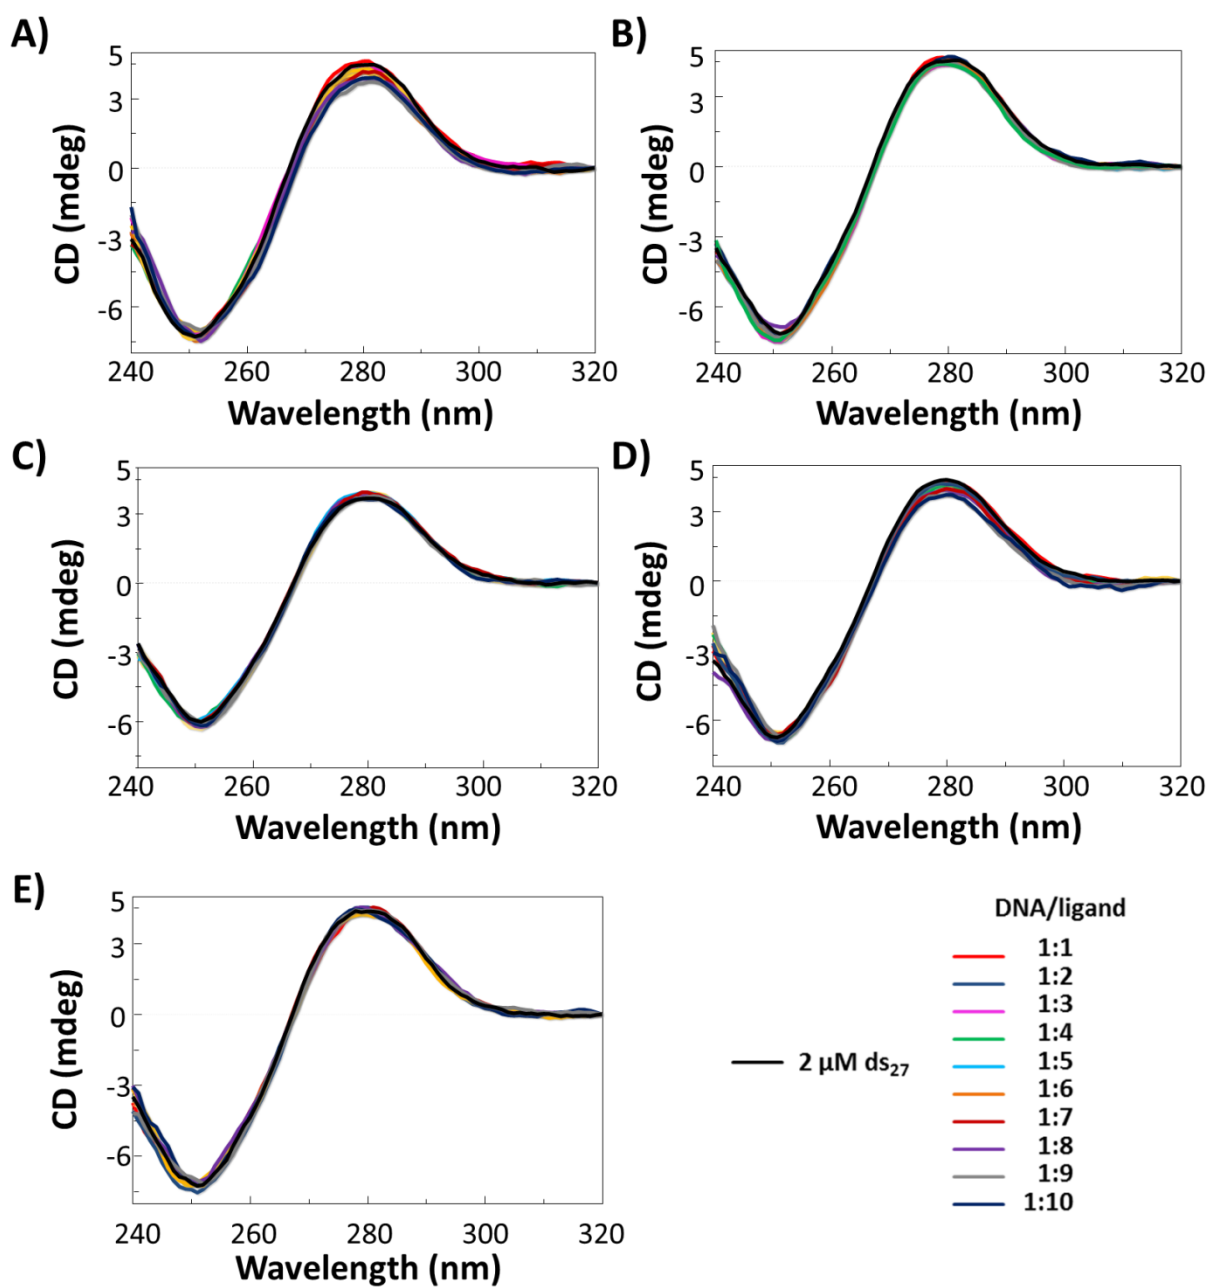

**Figure S7.** CD spectra (after ligand contribution subtraction) of 2  $\mu$ M solutions of ds<sub>27</sub> duplex in 5 mM KCl, 5 mM phosphate buffer, 5% DMSO (pH 7) with increasing amounts (up to 10 molar equivalents) of (A) Bulbocapnine, (B) Chelidone, (C) Ibogaine, (D) Rotenone and (E) Vomicine.

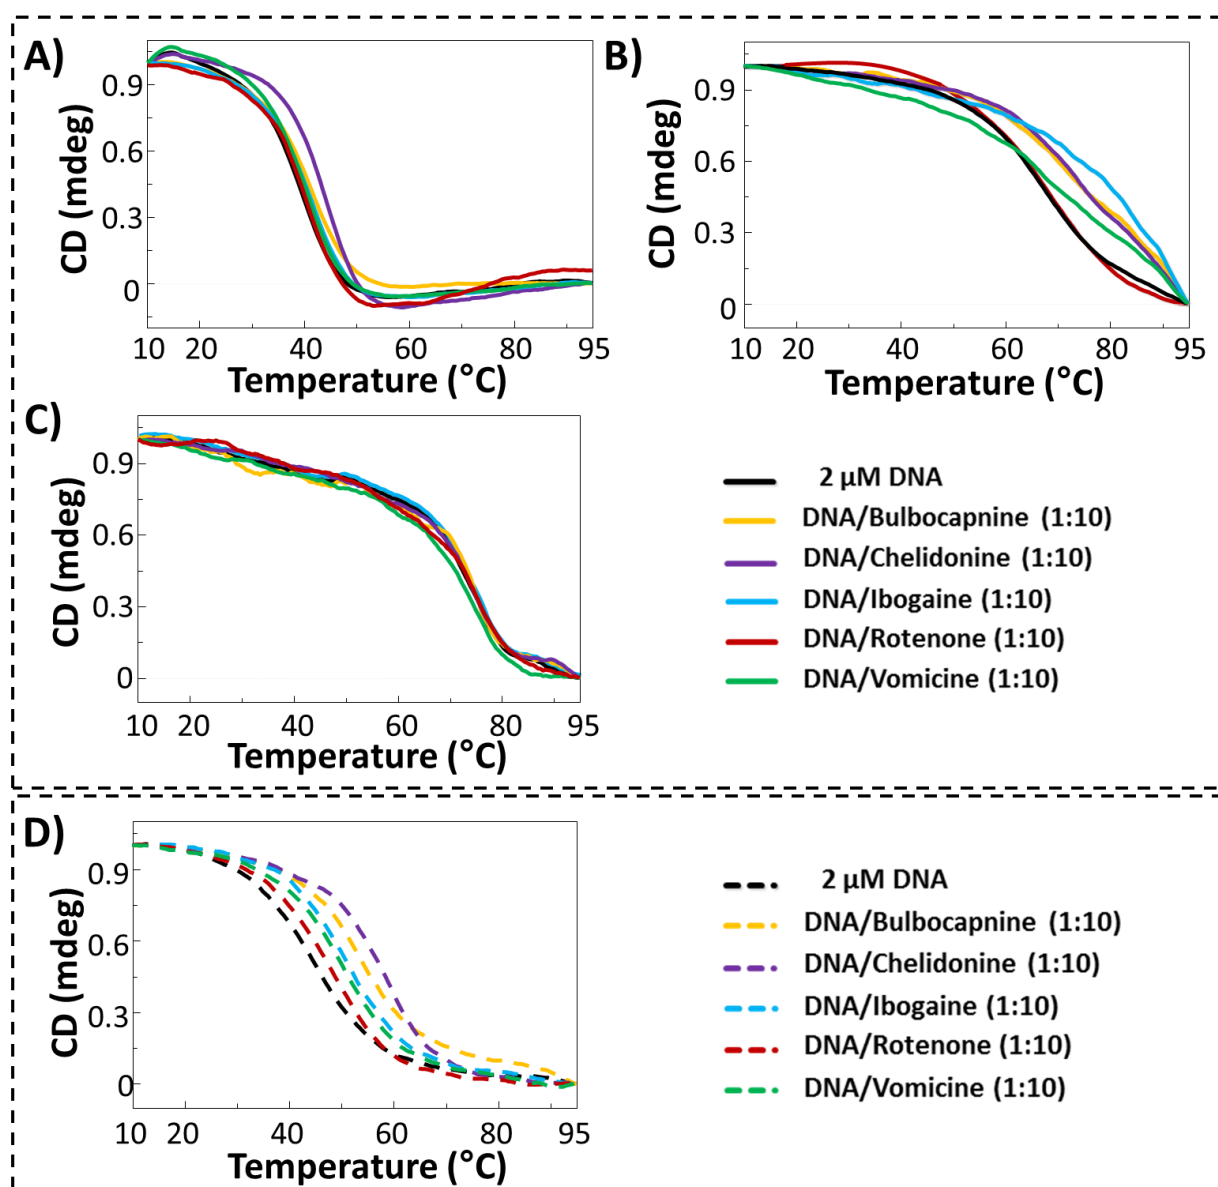

**Figure S8.** CD-melting curves (solid lines) for (A) tel<sub>26</sub>/ligand, (B) c-myc/ligand and (C) ds<sub>27</sub>/ligand mixtures (1:10) in 5 mM KCl, 5 mM phosphate buffer, 5% DMSO (pH 7), recorded at 290, 262 and 251 nm, respectively, and CD-melting curves (dashed lines) for (D) c-myc/ligand mixtures (1:10) in 0.5 mM KCl, 0.5 mM phosphate buffer, 5% DMSO (pH 7), recorded at 262 nm.

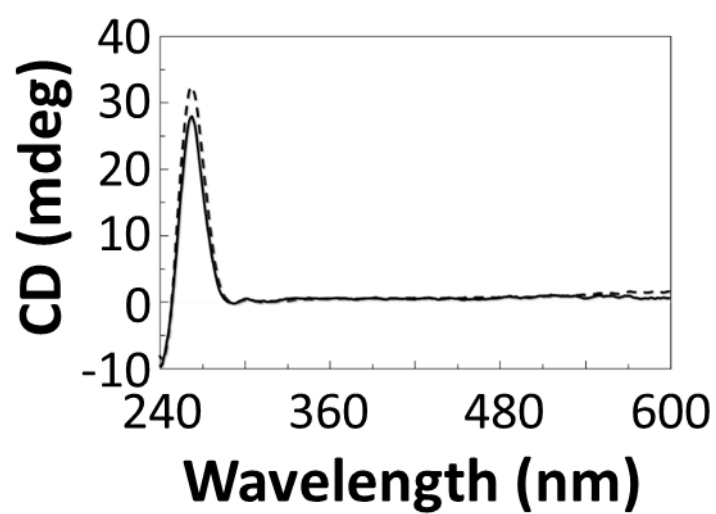

**Figure S9.** CD spectra for 2  $\mu$ M solutions of c-myc G4 in 5 mM KCl, 5 mM phosphate buffer, 5% DMSO (pH 7) (dashed line) or in 0.5 mM KCl, 0.5 mM phosphate buffer, 5% DMSO (pH 7) (solid line).

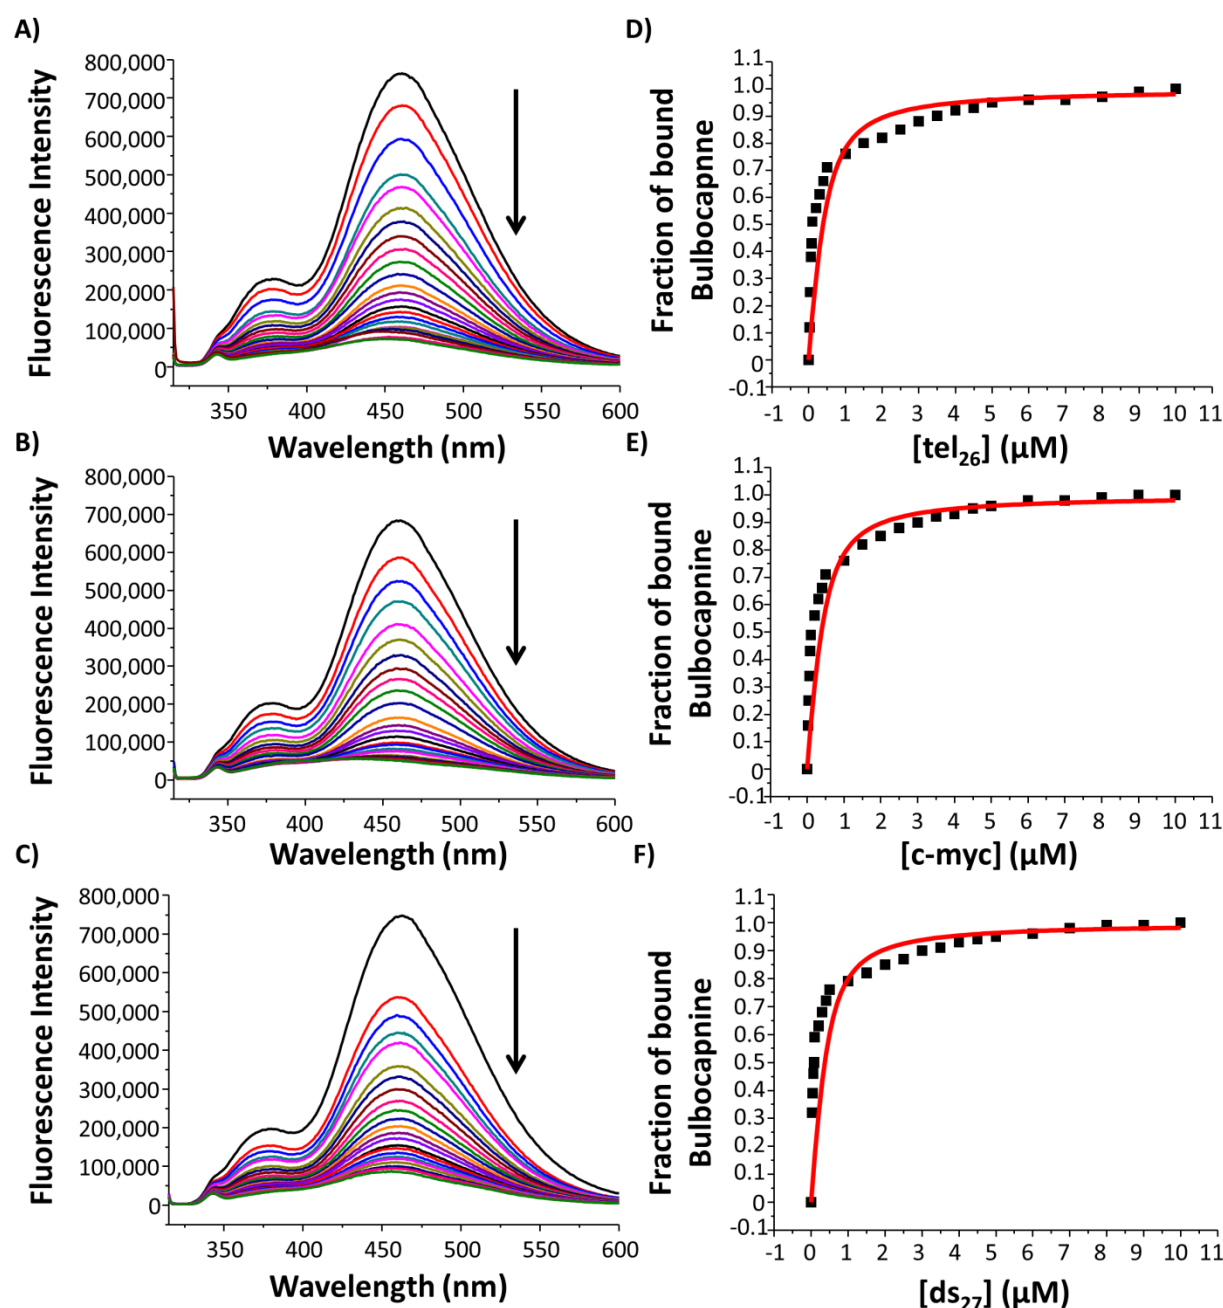

**Figure S10.** Left: Fluorescence emission spectra obtained by adding increasing amounts of (A) tel<sub>26</sub> G4, (B) c-myc G4 and (C) ds<sub>27</sub> duplex to 2 μM solutions of Bulbocapnine. Arrows indicate the variation of fluorescence intensity on increasing DNA concentration. Right: Representative binding curves obtained by plotting the fraction of bound Bulbocapnine to (D) tel<sub>26</sub> G4, (E) c-myc G4 and (F) ds<sub>27</sub> duplex as a function of the DNA concentration. The black squares represent the experimental data; the red lines represent the best fit obtained using an independent and equivalent-sites model.



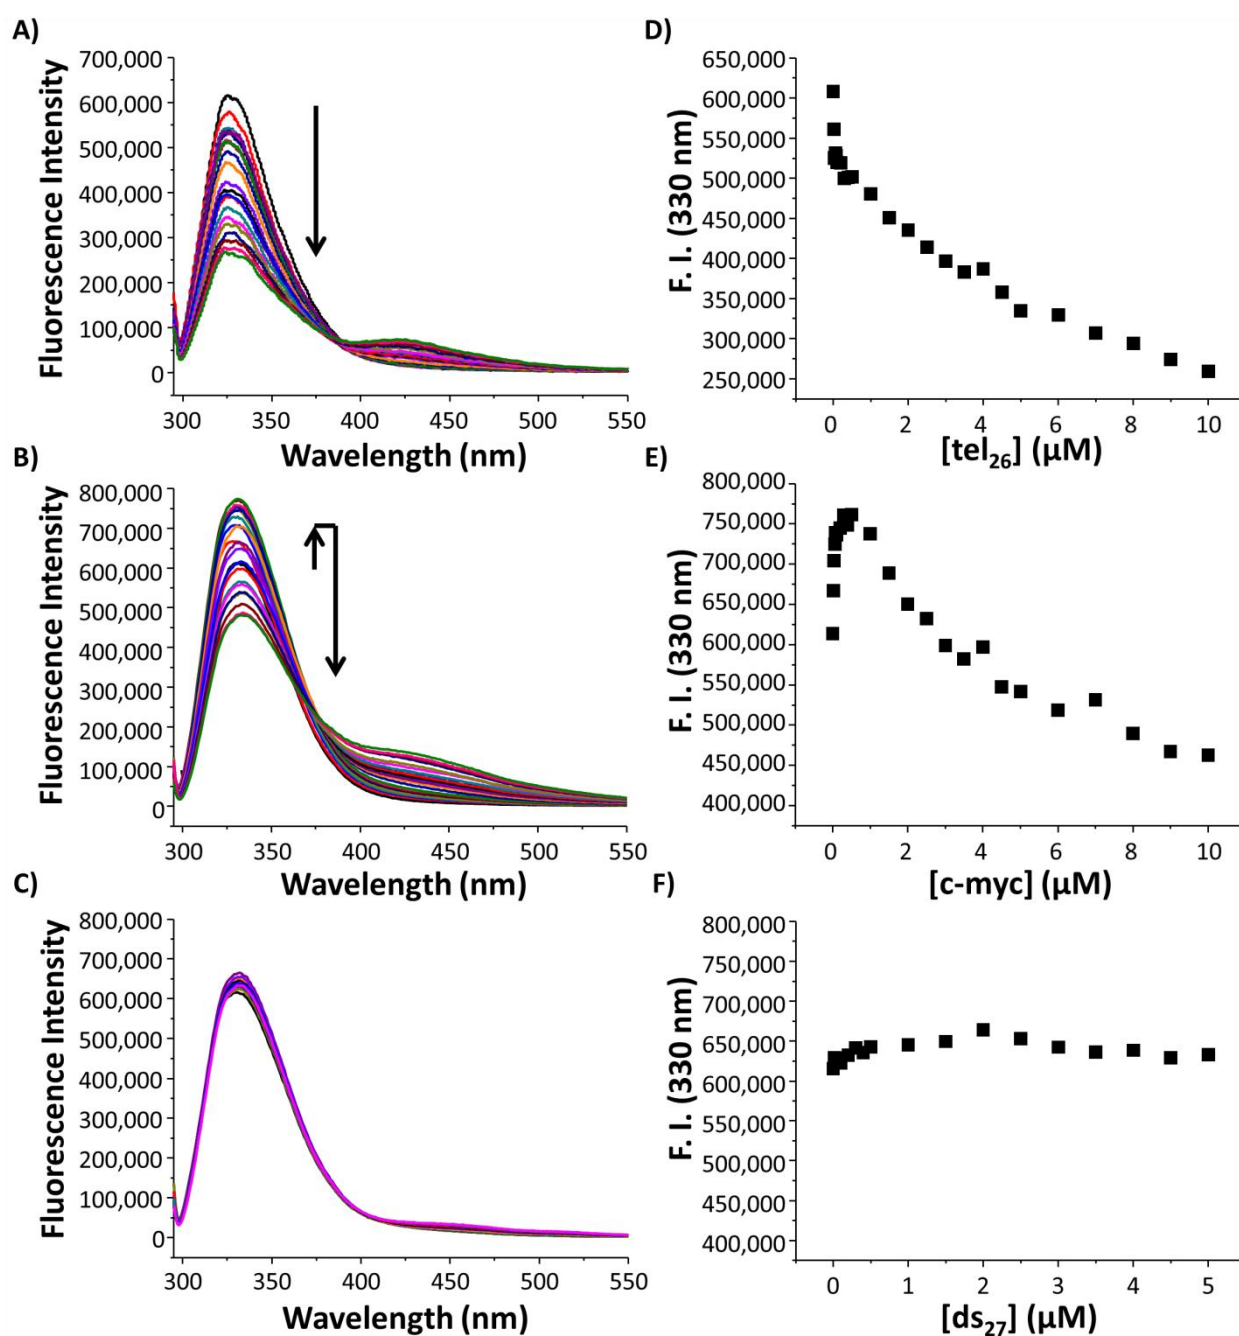

**Figure S11.** Left: Fluorescence emission spectra obtained by adding increasing amounts of (A) tel<sub>26</sub> G4, (B) c-myc G4 and (C) ds<sub>27</sub> duplex to 2 μM solutions of Chelidoniine. Arrows indicate the variation of fluorescence intensity on increasing DNA concentration. Right: Fluorescence intensity at 330 nm vs. concentration of (D) tel<sub>26</sub> G4, (E) c-myc G4 and (F) ds<sub>27</sub> duplex.

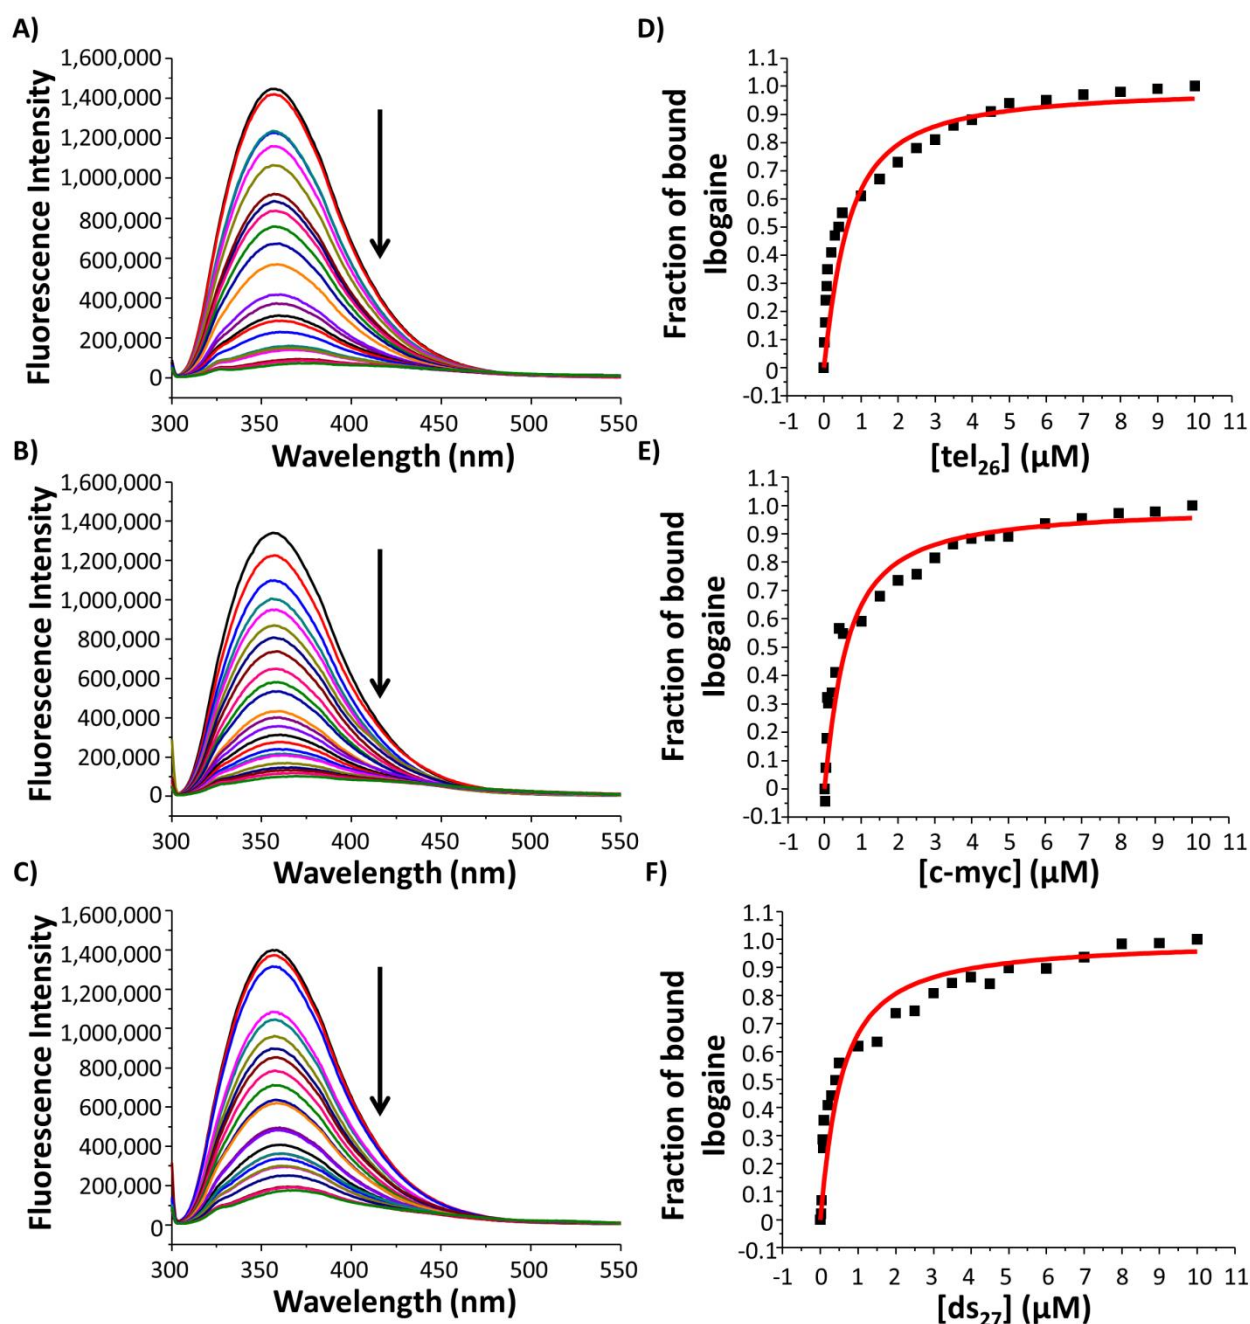

**Figure S12.** Left: Fluorescence emission spectra obtained by adding increasing amounts of (A) tel<sub>26</sub> G4, (B) c-myc G4 and (C) ds<sub>27</sub> duplex to 2 μM solutions of Ibogaine. Arrows indicate the variation of fluorescence intensity on increasing DNA concentration. Right: Representative binding curves obtained by plotting the fraction of bound Ibogaine to (D) tel<sub>26</sub> G4, (E) c-myc G4 and (F) ds<sub>27</sub> duplex as a function of the DNA concentration. The black squares represent the experimental data; the red lines represent the best fit obtained using an independent and equivalent-sites model.

## References

1. Meyer, A.; Imming, P. Benzylisoquinoline Alkaloids from the Papaveraceae: The Heritage of Johannes Gadamer (1867–1928). *J. Nat. Prod.* **2011**, *74*, 2482–2487, doi:10.1021/np2005049.
2. Colombo, M.L. Pharmacological activities of chelidonium majusl. (papaveraceae). *Pharmacol. Res.* **1996**, *33*, 127–134, doi:10.1006/phrs.1996.0019.
3. Akinboye, E.S. Biological Activities of Emetine. *Open Nat. Prod. J.* **2011**, *4*, 8–15, doi:10.2174/1874848101104010008.
4. Brown, P.N.; Roman, M.C.; Chang, C.; Jin, C.; Kuriyedath, R.; Lidstone, S.; Ly, L.; Ma, Y.-C.; Sigmund, P.; Smith, R.; et al. Determination of Hydrastine and Berberine in Goldenseal Raw Materials, Extracts, and Dietary Supplements by High-Performance Liquid Chromatography with UV: Collaborative Study. *J. AOAC Int.* **2008**, *91*, 694–701, doi:10.1093/jaoac/91.4.694.
5. Šantavý, F. Chapter 4 Papaveraceae Alkaloids. II. In *The Alkaloids: Chemistry and Physiology*; Elsevier BV, 1979; Vol. 17, pp. 385–544.
6. Guimarães, H.A.; Braz-Filho, R.; Vieira, I.J.C. <sup>1</sup>H and <sup>13</sup>C-NMR Data of the Simplest Plumeran Indole Alkaloids Isolated from *Aspidosperma* Species. *Mol.* **2012**, *17*, 3025–3043, doi:10.3390/molecules17033025.
7. Monache, F.D.; Monache, G.D.; Souza, M.A.D.M.E.; Cavalcanti, M.D.S.; Chiappeta, A. ChemInform Abstract: Isopentenylindole Derivatives and Other Components of *Esenbeckia leiocarpa*. *Chemin-* **1990**, *21*, 435–439, doi:10.1002/chin.199005299.
8. Ohiri, F.; Verpoorte, R.; Svendsen, A. The African strychnos species and their alkaloids: A review. *J. Ethnopharmacol.* **1983**, *9*, 167–223, doi:10.1016/0378-8741(83)90032-6.
9. Alper, K.R. Chapter 1 Ibogaine: A review. *The Alkaloids* **2001**, *56*, 1–38, doi:10.1016/s0099-9598(01)56005-8.
10. Amaral, A.C.F.; Ramos, A.D.S.; Ferreira, J.L.P.; Dos Santos, A.R.; Da Cruz, J.D.; De Luna, A.V.M.; Nery, V.V.C.; De Lima, I.C.; Chaves, M.H.D.C.; Silva, J.R.D.A.; et al. LC-HRMS for the Identification of  $\beta$ -Carboline and Canthinone Alkaloids Isolated from Natural Sources. *Mass Spectrometry* **2017**, *6*, 187–207, doi:10.5772/68075.
11. Li, H.-J.; Jiang, Y.; Li, P. Chemistry, bioactivity and geographical diversity of steroidal alkaloids from the Liliaceae family. *Nat. Prod. Rep.* **2006**, *23*, 735–752, doi:10.1039/b609306j.
12. Song, K.M.; Park, S.W.; Hong, W.H.; Lee, H.; Kwak, S.S.; Liu, J.R. Isolation of vindoline from *Catharanthus roseus* by supercritical fluid extraction. *Biotechnol. Prog.* **1992**, *8*, 583–586, doi:10.1021/bp00018a018.
13. Monache, G.D.; Gonzalez, J.; Bettolo, G. Prenylated benzophenones from *Vismia decipiens*. *Phytochemistry* **1980**, *19*, 2025–2028, doi:10.1016/0031-9422(80)83030-5.
14. Monache, F.; Mc Quhae, M.; Ferrari, F.; Marini-Bettolo, G. Ferruginin A and B and ferruanthrone, new triprenylated anthranoids from *Vismia baccifera* var. *ferruginea*. *Tetrahedron* **1979**, *35*, 2143–2149, doi:10.1016/0040-4020(79)87031-3.
15. Monache, F.D.; Torres, F.F.; Marini-Bettolo, G.B.; De Lima, R.A. Chemistry of *Vismia* Genus. Note V:  $\gamma$ -Hydroxy- and  $\gamma,\gamma'$ -Dihydroxy-Ferruginin A. *J. Nat. Prod.* **1980**, *43*, 487–494, doi:10.1021/np50010a009.
16. Patel, K.; Patel, D.K. Medicinal importance, pharmacological activities, and analytical aspects of aloin: A concise report. *J. Acute Dis.* **2013**, *2*, 262–269, doi:10.1016/s2221-6189(13)60141-9.
17. Monache, F.D.; Ferrari, F.; Marini-Bettolo, G.B.; Maxfield, P.; et al. Vismiones from *Vismia baccifera* var. *dealdata* (H.B.K.): Chemistry and X-ray structure determination. *Gazz. Chim. Ital.* **1979**, *109*, 301–310.
18. Delfel, N.E.; Tallent, W.H.; Carlson, D.G.; Wolff, I.A. Distribution of rotenone and deguelin in *Tephrosia vogelii* and separation of rotenoid-rich fractions. *J. Agric. Food Chem.* **1970**, *18*, 385–390, doi:10.1021/jf60169a053.
19. Irvine, J.E.; Freyre, R.H. Source Materials for Rotenone, Occurrence of Rotenoids in Some Species of the Genus *Tephrosia*. *J. Agric. Food Chem.* **1959**, *7*, 106–107, doi:10.1021/jf60096a002.
20. Gonzalez, J.G.; Olivares, E.M.; Monache, F.D. Citrans and cyclols from *Clusia multiflora*. *Phytochemistry* **1995**, *38*, 485–489, doi:10.1016/0031-9422(94)00642-7.
21. Sobolewska, D.; Galanty, A.; Grabowska, K.; Makowska-Wąs, J.; Wróbel-Biedrawa, D.; Podolak, I. Saponins as cytotoxic agents: an update (2010–2018). Part I—steroidal saponins. *Phytochem. Rev.* **2020**, *19*, 139–189, doi:10.1007/s11101-020-09661-0.
22. Jograna, M.; Patil, D.; Kotwal, S.V., Digitalis species a potent herbal drug: A review on their pharmacognosy and pharmacological activities. *J. Curr. Pharms Res.* **2020**, *10*(4), 3821–3831.
23. Zughdani, M.; Yusufoglu, H.S.; Ekiz, G.; Linden, A.; Çalış, I. Ecdysteroids from the underground parts of *Rhaponticum acule* (L.) DC. *Phytochemistry* **2020**, *180*, 112530, doi:10.1016/j.phytochem.2020.112530.
24. Mascarello, A.; Chiaradia-Delatorre, L.D.; Mori, M.; Terenzi, H.; Botta, B. Mycobacterium tuberculosis-Secreted Tyrosine Phosphatases as Targets Against Tuberculosis: Exploring Natural Sources in Searching for New Drugs. *Curr. Pharm. Des.* **2016**, *22*, 1561–1569, doi:10.2174/1381612822666160112130539.
25. González, A.G.; Pérez, E.M.R.; Barrera, J.B. Biologically Active Compounds from the Lichen *Ramalina hierrensis*. *Planta Medica* **1991**, *57*, A2, doi:10.1055/s-2006-960238.
26. Botelho, A.F.M.; Pierezan, F.; Soto-Blanco, B.; Melo, M.M. A review of cardiac glycosides: Structure, toxicokinetics, clinical signs, diagnosis and antineoplastic potential. *Toxicon* **2019**, *158*, 63–68, doi:10.1016/j.toxicon.2018.11.429.
